# Supplementary material for: M©B7O7+ (M = Ni, Pd, Pt): aromatic molecular stars with a planar heptacoordinate transition metal
Source: Royal Society of Chemistry journal article supplement (doi:10.1039/d1cc05844d), 2021-01-01
Supplement: d1cc05844d1.pdf [file d1cc05844d1.pdf]

Electronic Supplementary Information

**M@B<sub>7</sub>O<sub>7</sub><sup>±</sup> (M = Ni, Pd, Pt): Aromatic molecular stars with a planar heptacoordinate transition metal**

Bo Jin,<sup>a</sup> Rui Sun,<sup>a</sup> Bin Huo,<sup>a</sup> Caixia Yuan<sup>a</sup> and Yan-Bo Wu<sup>a,\*</sup>

- a. Key Laboratory of Materials for Energy Conversion and Storage, Key Laboratory of Chemical Biology and Molecular Engineering of Ministry of Education, Institute of Molecular Science, Shanxi University, Taiyuan, Shanxi 030006, People's Republic of China.

\*To whom correspondence should be addressed.

E-mail: [wyb@sxu.edu.cn](mailto:wyb@sxu.edu.cn) (Y.-B. W.)

Contents

**SI1:** The results for the electronic structure analysis, the distribution of NICS values, the potential energy surface explorations, and the BOMD simulations of M@B<sub>7</sub>O<sub>7</sub><sup>-/+</sup> (M = Ni, Pd, Pt).

**Fig. S1–S2.** AdNDP bonding patterns of Ni@B<sub>7</sub>O<sub>7</sub><sup>+(1)</sup>, Ni@B<sub>7</sub>O<sub>7</sub><sup>-(1')</sup>, Pd@B<sub>7</sub>O<sub>7</sub><sup>+(2)</sup> and Pd@B<sub>7</sub>O<sub>7</sub><sup>-(2')</sup>. Only one orbital is showed when multiple orbitals in a pattern are identical due to molecular symmetry.

**Fig. S3–S4.** The distribution of NICS values for 1', 1, 2', and 2. Panels A and C correspond to the molecular planes, while panels B and D correspond to the planes parallel to and located 1 Å above the molecular planes. The NICS values that are negative, positive, and close to zero indicate aromaticity, anti-aromaticity, and non-aromaticity, respectively.

**Fig. S5.** Structures and relative energies (ΔE, in kcal mol<sup>-1</sup> at the CCSD(T)//PBE0 level) of M@B<sub>7</sub>O<sub>7</sub><sup>-/+</sup> (M = Ni, Pd, Pt) and their low-energy isomers.

**Fig. S6–S7.** RMSD (in Å) versus simulation time (in ps) for the BOMD simulation of M@B<sub>7</sub>O<sub>7</sub><sup>±</sup> (M = Ni, Pd, Pt) at the PBE/DZVP level. The examined temperatures include 298, and 1000 K.

**SI2:** Cartesian coordinates of PBE0/BS1-optimized structures shown in Fig. S5

**SI1:** The results for the electronic structure analysis, the distribution of NICS values, the potential energy surface explorations, and the BOMD simulations of  $M@B_7O_7^{-/+}$  ( $M = Ni, Pd, Pt$ ).

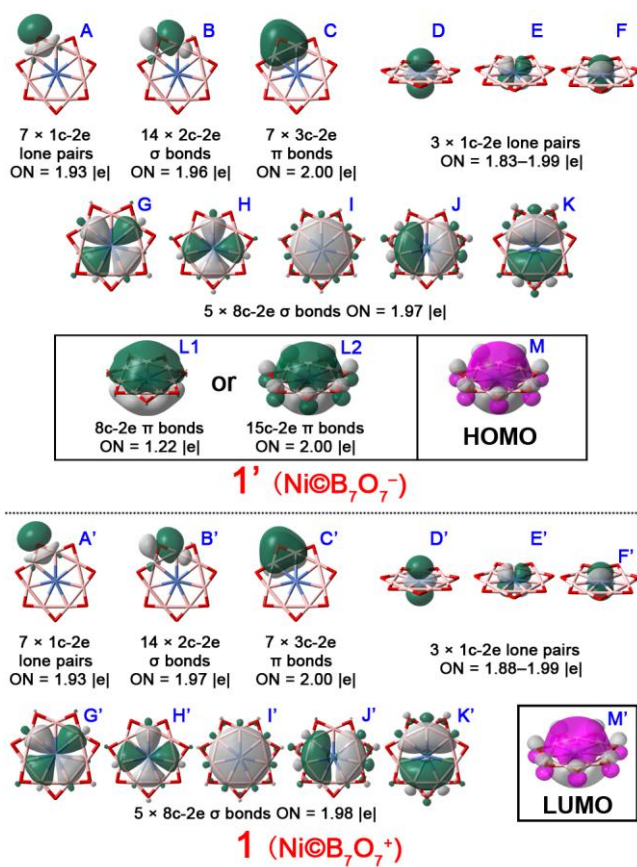

**Fig. S1.** AdNDP bonding patterns of  $Ni@B_7O_7^-$  (**1'**) and  $Ni@B_7O_7^+$  (**1**). Only one orbital is shown when multiple orbitals in a pattern are identical due to molecular symmetry.

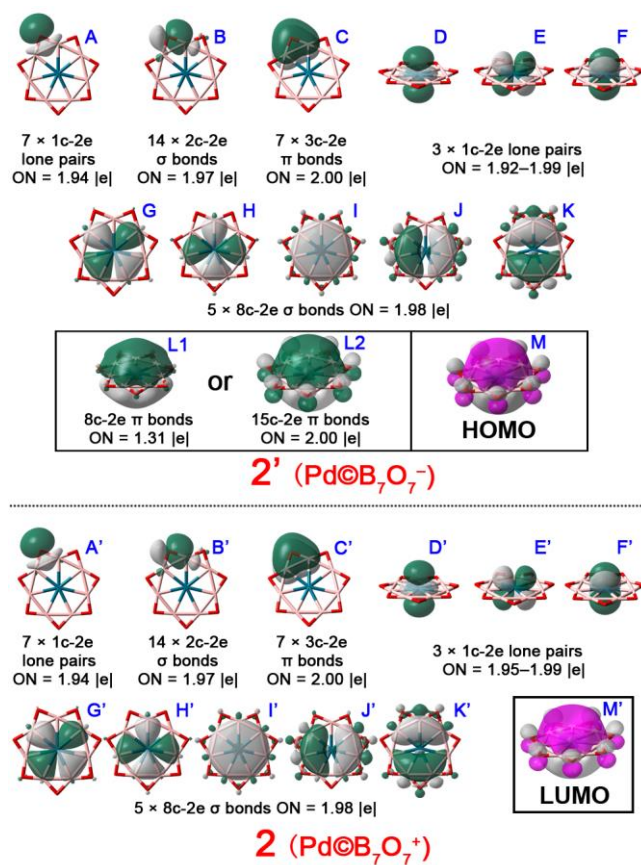

**Fig. S2.** AdNDP bonding patterns of Pd@B<sub>7</sub>O<sub>7</sub><sup>-</sup>(**2'**) and Pd@B<sub>7</sub>O<sub>7</sub><sup>+</sup>(**2**). Only one orbital is showed when multiple orbitals in a pattern are identical due to molecular symmetry.

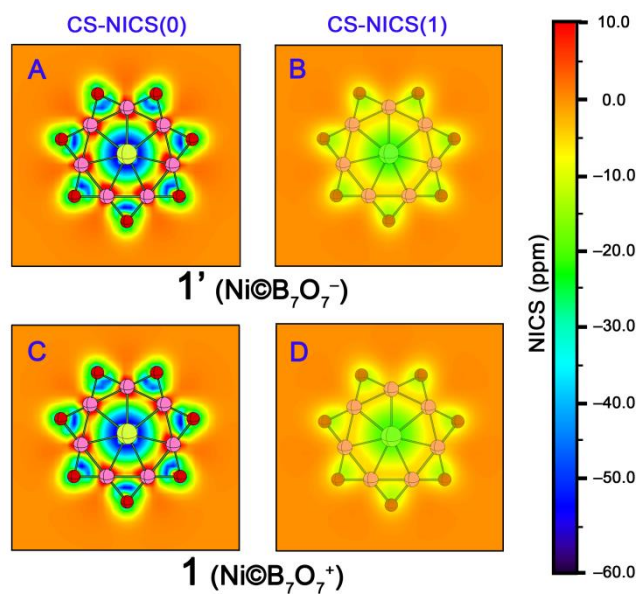

**Fig. S3.** The distribution of NICS values for  $1'$  and  $1$ . Panels A and C correspond to the molecular planes, while panels B and D correspond to the planes parallel to and located 1 Å above the molecular planes. The NICS values that are negative, positive, and close to zero indicate aromaticity, anti-aromaticity, and non-aromaticity, respectively.

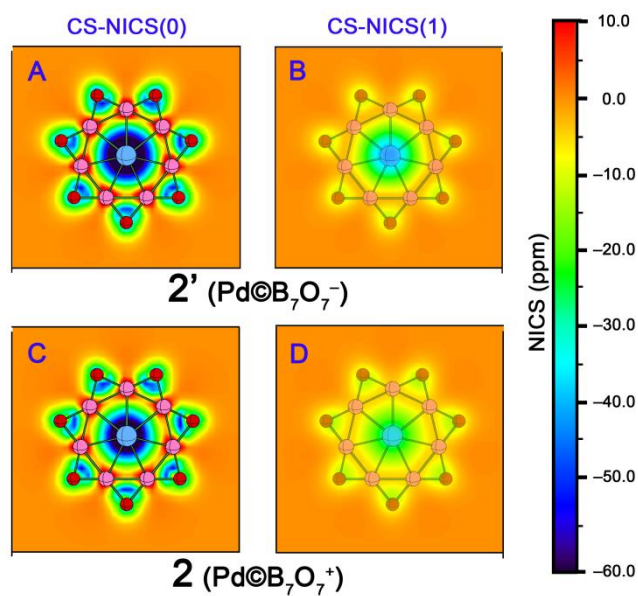

**Fig. S4.** The distribution of NICS values for  $2'$  and  $2$ . Panels A and C correspond to the molecular planes, while panels B and D correspond to the planes parallel to and located 1 Å above the molecular planes. The NICS values that are negative, positive, and close to zero indicate aromaticity, anti-aromaticity, and non-aromaticity, respectively.

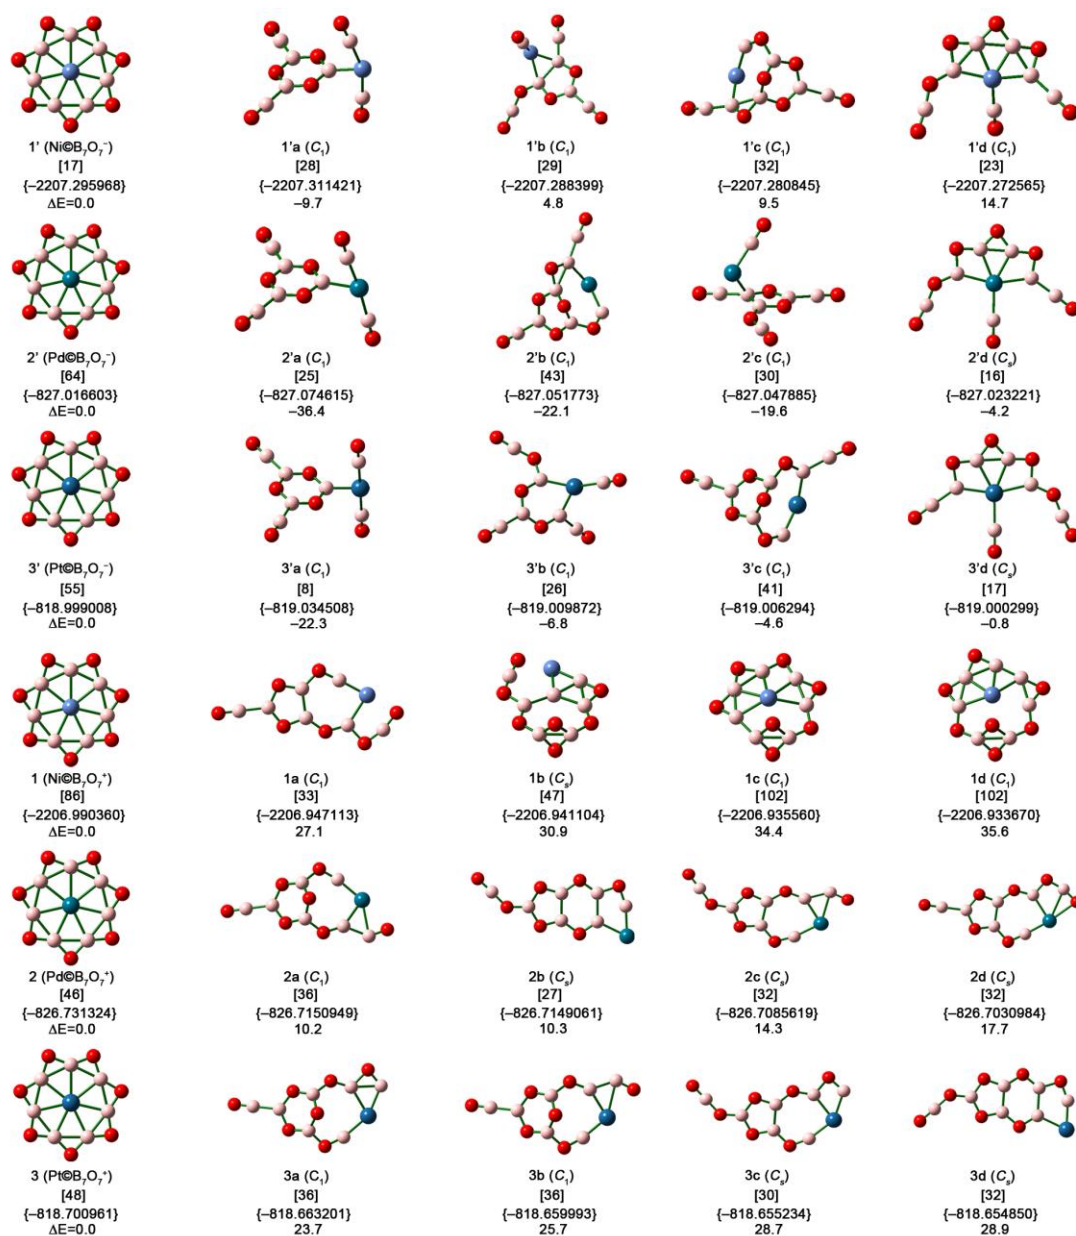

**Fig. S5.** Structures and relative energies ( $\Delta E$ , in kcal mol<sup>-1</sup> at the CCSD(T)//PBE0 level) of M@B<sub>7</sub>O<sub>7</sub><sup>-/+</sup> (M = Ni, Pd, Pt) and their low-energy isomers. The lowest harmonic frequencies (in cm<sup>-1</sup> at the PBE0 level) of all clusters are given in square brackets, and whose total energies expressed as a value in curly brackets (in a.u. at the CCSD(T)//PBE0 level).

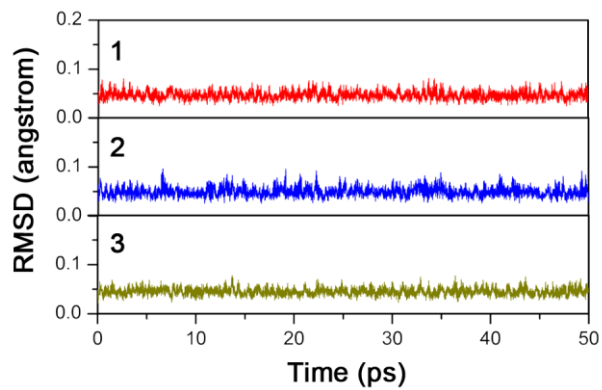

**Fig. S6.** RMSD (in Å) versus simulation time (in ps) for the BOMD simulation of  $M@B_7O_7^+$  ( $M = Ni, Pd, Pt$ ) at the PBE/DZVP level and 298 K.

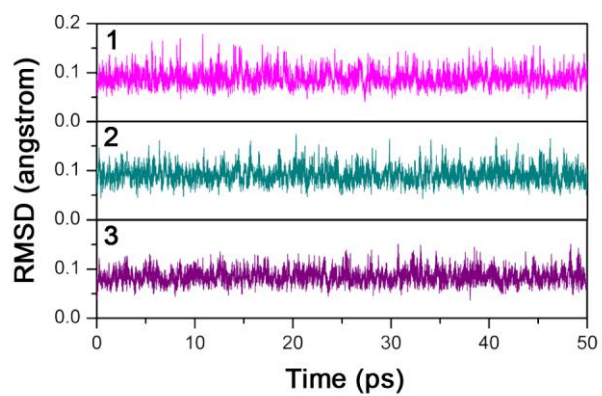

**Fig. S7.** RMSD (in Å) versus simulation time (in ps) for the BOMD simulation of  $M@B_7O_7^+$  ( $M = Ni, Pd, Pt$ ) at the PBE/DZVP level and 1000 K.

**SI2:** Cartesian coordinates of PBE0/BS1-optimized structures shown in Fig. S5Ni@B<sub>7</sub>O<sub>7</sub><sup>-</sup> (**1'**)

|    |             |             |            |
|----|-------------|-------------|------------|
| B  | 0.00000000  | 2.01687400  | 0.00000000 |
| B  | -1.57685600 | 1.25750000  | 0.00000000 |
| B  | -1.96630700 | -0.44879700 | 0.00000000 |
| B  | 1.57685600  | 1.25750000  | 0.00000000 |
| B  | 1.96630700  | -0.44879700 | 0.00000000 |
| B  | 0.87508900  | -1.81714100 | 0.00000000 |
| B  | -0.87508900 | -1.81714100 | 0.00000000 |
| O  | -2.26509200 | -1.80635100 | 0.00000000 |
| O  | -1.25703100 | 2.61025300  | 0.00000000 |
| O  | -2.82452400 | 0.64467900  | 0.00000000 |
| O  | 1.25703100  | 2.61025300  | 0.00000000 |
| O  | 2.26509200  | -1.80635100 | 0.00000000 |
| O  | 0.00000000  | -2.89716200 | 0.00000000 |
| O  | 2.82452400  | 0.64467900  | 0.00000000 |
| Ni | 0.00000000  | 0.00000000  | 0.00000000 |

Pd@B<sub>7</sub>O<sub>7</sub><sup>-</sup> (**2'**)

|    |             |             |            |
|----|-------------|-------------|------------|
| B  | 0.00000000  | 2.09309900  | 0.00000000 |
| B  | -1.63645100 | 1.30502600  | 0.00000000 |
| B  | -2.04062100 | -0.46575800 | 0.00000000 |
| B  | 1.63645100  | 1.30502600  | 0.00000000 |
| B  | 2.04062100  | -0.46575800 | 0.00000000 |
| B  | 0.90816200  | -1.88581700 | 0.00000000 |
| B  | -0.90816200 | -1.88581700 | 0.00000000 |
| O  | -2.30691200 | -1.83970100 | 0.00000000 |
| O  | -1.28024000 | 2.65844500  | 0.00000000 |
| O  | -2.87667300 | 0.65658200  | 0.00000000 |
| O  | 1.28024000  | 2.65844500  | 0.00000000 |
| O  | 2.30691200  | -1.83970100 | 0.00000000 |
| O  | 0.00000000  | -2.95065200 | 0.00000000 |
| O  | 2.87667300  | 0.65658200  | 0.00000000 |
| Pd | 0.00000000  | 0.00000000  | 0.00000000 |

Pt@B<sub>7</sub>O<sub>7</sub><sup>-</sup> (**3'**)

|   |             |             |            |
|---|-------------|-------------|------------|
| B | 0.00000000  | 2.12503800  | 0.00000000 |
| B | 1.66142100  | 1.32493900  | 0.00000000 |
| B | 2.07175800  | -0.47286500 | 0.00000000 |
| B | -1.66142100 | 1.32493900  | 0.00000000 |
| B | -2.07175800 | -0.47286500 | 0.00000000 |
| B | -0.92201900 | -1.91459300 | 0.00000000 |
| B | 0.92201900  | -1.91459300 | 0.00000000 |
| O | 2.32746900  | -1.85609400 | 0.00000000 |

|    |             |             |            |
|----|-------------|-------------|------------|
| O  | 1.29164800  | 2.68213400  | 0.00000000 |
| O  | 2.90230600  | 0.66243200  | 0.00000000 |
| O  | -1.29164800 | 2.68213400  | 0.00000000 |
| O  | -2.32746900 | -1.85609400 | 0.00000000 |
| O  | 0.00000000  | -2.97694400 | 0.00000000 |
| O  | -2.90230600 | 0.66243200  | 0.00000000 |
| Pt | 0.00000000  | 0.00000000  | 0.00000000 |

Ni@B<sub>7</sub>O<sub>7</sub><sup>-</sup> (1)

|    |             |             |            |
|----|-------------|-------------|------------|
| B  | 0.00000000  | 2.08990500  | 0.00000000 |
| B  | 1.63395300  | 1.30303400  | 0.00000000 |
| B  | 2.03750600  | -0.46504800 | 0.00000000 |
| B  | -1.63395300 | 1.30303400  | 0.00000000 |
| B  | -2.03750600 | -0.46504800 | 0.00000000 |
| B  | -0.90677600 | -1.88293900 | 0.00000000 |
| B  | 0.90677600  | -1.88293900 | 0.00000000 |
| O  | 2.26786900  | -1.80856500 | 0.00000000 |
| O  | 1.25857200  | 2.61345200  | 0.00000000 |
| O  | 2.82798600  | 0.64546900  | 0.00000000 |
| O  | -1.25857200 | 2.61345200  | 0.00000000 |
| O  | -2.26786900 | -1.80856500 | 0.00000000 |
| O  | 0.00000000  | -2.90071300 | 0.00000000 |
| O  | -2.82798600 | 0.64546900  | 0.00000000 |
| Ni | 0.00000000  | 0.00000000  | 0.00000000 |

Pd@B<sub>7</sub>O<sub>7</sub><sup>-</sup> (2)

|    |             |             |            |
|----|-------------|-------------|------------|
| B  | 0.00000000  | 2.15903000  | 0.00000000 |
| B  | 1.68799800  | 1.34613300  | 0.00000000 |
| B  | 2.10489900  | -0.48042900 | 0.00000000 |
| B  | -1.68799800 | 1.34613300  | 0.00000000 |
| B  | -2.10489900 | -0.48042900 | 0.00000000 |
| B  | -0.93676800 | -1.94521900 | 0.00000000 |
| B  | 0.93676800  | -1.94521900 | 0.00000000 |
| O  | 2.30375200  | -1.83718100 | 0.00000000 |
| O  | 1.27848600  | 2.65480300  | 0.00000000 |
| O  | 2.87273100  | 0.65568200  | 0.00000000 |
| O  | -1.27848600 | 2.65480300  | 0.00000000 |
| O  | -2.30375200 | -1.83718100 | 0.00000000 |
| O  | 0.00000000  | -2.94660900 | 0.00000000 |
| O  | -2.87273100 | 0.65568200  | 0.00000000 |
| Pd | 0.00000000  | 0.00000000  | 0.00000000 |

Pt@B<sub>7</sub>O<sub>7</sub><sup>-</sup> (3)

|   |            |            |            |
|---|------------|------------|------------|
| B | 0.00000000 | 2.16915700 | 0.00000000 |
|---|------------|------------|------------|



|    |             |             |            |
|----|-------------|-------------|------------|
| B  | 1.69591500  | 1.35244700  | 0.00000000 |
| B  | 2.11477200  | -0.48268300 | 0.00000000 |
| B  | -1.69591500 | 1.35244700  | 0.00000000 |
| B  | -2.11477200 | -0.48268300 | 0.00000000 |
| B  | -0.94116200 | -1.95434300 | 0.00000000 |
| B  | 0.94116200  | -1.95434300 | 0.00000000 |
| O  | 2.30858700  | -1.84103700 | 0.00000000 |
| O  | 1.28116900  | 2.66037500  | 0.00000000 |
| O  | 2.87876100  | 0.65705800  | 0.00000000 |
| O  | -1.28116900 | 2.66037500  | 0.00000000 |
| O  | -2.30858700 | -1.84103700 | 0.00000000 |
| O  | 0.00000000  | -2.95279400 | 0.00000000 |
| O  | -2.87876100 | 0.65705800  | 0.00000000 |
| Pt | 0.00000000  | 0.00000000  | 0.00000000 |

**(1'a)**

|    |             |             |             |
|----|-------------|-------------|-------------|
| B  | 1.61763500  | 1.17834000  | -0.00017500 |
| B  | -0.49262200 | 0.00000400  | 0.00032100  |
| B  | 2.48240100  | 2.63802100  | -0.00030700 |
| B  | -1.95769000 | -0.00000800 | 1.90850100  |
| B  | 1.61762900  | -1.17834500 | -0.00019700 |
| B  | 2.48238600  | -2.63803100 | -0.00039200 |
| B  | -1.95903600 | 0.00003400  | -1.90824500 |
| O  | 3.10960700  | 3.66675400  | -0.00036400 |
| O  | 0.27500800  | 1.19025800  | 0.00021600  |
| O  | -1.70359600 | 0.00009700  | -3.10159800 |
| O  | 2.33575100  | -0.00000400 | -0.00036000 |
| O  | 3.10959000  | -3.66676500 | -0.00048100 |
| O  | -1.70162800 | -0.00008400 | 3.10171400  |
| O  | 0.27500200  | -1.19025500 | 0.00019300  |
| Ni | -2.30540600 | -0.00000300 | 0.00028300  |

**(1'b)**

|   |             |             |             |
|---|-------------|-------------|-------------|
| B | 1.77420300  | -1.14193300 | 0.06400800  |
| B | -0.37561700 | -0.88737000 | 0.78035500  |
| B | 3.18352600  | -1.98374900 | -0.33724200 |
| B | -2.06822200 | -0.11018300 | -1.85977100 |
| B | 0.41821700  | 0.68962700  | 0.28864900  |
| B | 1.30480000  | 3.01819500  | 0.33845400  |
| B | -1.82061300 | -1.25768200 | 1.54001900  |
| O | 4.19209300  | -2.58673000 | -0.60553100 |
| O | 0.70383200  | -1.78579700 | 0.60317700  |
| O | -2.87671700 | -1.42163100 | 2.12385600  |
| O | 1.68234600  | 0.20943500  | -0.11119000 |

|    |             |             |             |
|----|-------------|-------------|-------------|
| O  | 2.07356600  | 3.95282100  | 0.20986400  |
| O  | -2.37950700 | -0.35479600 | -3.01220200 |
| O  | 0.40688100  | 2.08378500  | 0.52870300  |
| Ni | -1.51790800 | 0.27102800  | -0.07020600 |

**(1'c)**

|    |             |             |             |
|----|-------------|-------------|-------------|
| B  | -3.11914900 | -1.21456100 | -0.06829700 |
| B  | 0.04813900  | -0.52603600 | 0.94248700  |
| B  | -0.68553000 | 2.09792800  | -0.54277500 |
| B  | 2.22549000  | -0.35866900 | -0.03436300 |
| B  | -1.60476600 | -0.97967400 | 0.56072100  |
| B  | 0.95010100  | 1.44101200  | 0.64114500  |
| B  | 3.67247800  | -1.02316700 | -0.62379400 |
| O  | 2.10570500  | 1.02089200  | 0.00027800  |
| O  | 0.31428900  | 2.61890300  | 0.16058500  |
| O  | -4.15759300 | -1.28517600 | -0.69946600 |
| O  | -0.87645400 | -1.39643300 | 1.62252000  |
| O  | 1.22853200  | -1.16203100 | 0.35092700  |
| O  | 4.70589300  | -1.49623900 | -1.03140200 |
| O  | 0.42237500  | 0.69656300  | 1.64123800  |
| Ni | -1.33485000 | 0.38728600  | -0.74046700 |

**(1'd)**

|    |             |             |             |
|----|-------------|-------------|-------------|
| B  | 2.13398800  | 0.09514700  | -0.04144600 |
| B  | 0.01035600  | 1.57646100  | 1.02146800  |
| B  | 1.44942400  | -1.52147700 | 0.03739100  |
| B  | -0.30826900 | -1.93205900 | -0.06329000 |
| B  | -1.70101700 | -0.76930700 | -0.00889200 |
| B  | -3.43895600 | 0.91703900  | -0.48406600 |
| B  | 3.11346000  | 1.32812200  | -0.62519700 |
| O  | -0.06452300 | 2.52806900  | 1.78169000  |
| O  | 2.71538900  | -1.14603000 | 0.37655400  |
| O  | 3.78222100  | 2.21463600  | -1.10262000 |
| O  | 0.80802100  | -2.75878000 | 0.01808400  |
| O  | -3.97444700 | 1.96528400  | -0.78583100 |
| O  | -2.99388600 | -0.28248500 | -0.19496500 |
| O  | -1.63655300 | -2.17320500 | 0.16155600  |
| Ni | 0.16483200  | -0.04462600 | -0.04341300 |

**(2'a)**

|   |             |             |             |
|---|-------------|-------------|-------------|
| B | 2.04252100  | 1.17905500  | -0.18554500 |
| B | -0.03273400 | -0.00002500 | 0.17996700  |
| B | 2.89344400  | 2.63788200  | -0.33480200 |
| B | -1.12451500 | -0.00011100 | 2.07861900  |

|    |             |             |             |
|----|-------------|-------------|-------------|
| B  | 2.04256700  | -1.17900900 | -0.18557800 |
| B  | 2.89360500  | -2.63775600 | -0.33496100 |
| B  | -2.62634800 | 0.00005800  | -1.79294400 |
| O  | 3.51385300  | 3.66450800  | -0.44260500 |
| O  | 0.71920300  | 1.18829200  | 0.05535200  |
| O  | -2.99354400 | 0.00012300  | -2.95489300 |
| O  | 2.74589000  | 0.00004200  | -0.31772100 |
| O  | 3.51412900  | -3.66430300 | -0.44285900 |
| O  | -0.75491600 | -0.00014500 | 3.23849700  |
| O  | 0.71925700  | -1.18830400 | 0.05533300  |
| Pd | -1.95986300 | -0.00004700 | 0.20320400  |

**(2'b)**

|    |             |             |             |
|----|-------------|-------------|-------------|
| B  | -3.16105700 | -1.53139300 | 0.12729700  |
| B  | 0.17583400  | -0.66678200 | 0.90427900  |
| B  | -0.24050400 | 2.30991500  | -0.22991400 |
| B  | 2.39432800  | -0.53813500 | 0.00219100  |
| B  | -1.58839700 | -1.06004300 | 0.47213500  |
| B  | 1.26734800  | 1.25303100  | 0.92016100  |
| B  | 3.79047600  | -1.24192700 | -0.65920300 |
| O  | 2.41202700  | 0.81840400  | 0.27357000  |
| O  | 0.77562800  | 2.54028900  | 0.59553500  |
| O  | -4.28843300 | -1.78572900 | -0.24104200 |
| O  | -0.78844000 | -1.56643800 | 1.44454500  |
| O  | 1.30743000  | -1.28695200 | 0.22409300  |
| O  | 4.78863200  | -1.74386700 | -1.11612100 |
| O  | 0.60653000  | 0.42112600  | 1.75952400  |
| Pd | -1.12385100 | 0.61308700  | -0.67838100 |

**(2'c)**

|   |             |             |             |
|---|-------------|-------------|-------------|
| B | 1.99573500  | -0.87833400 | 0.42243200  |
| B | -0.15998500 | -0.54220300 | 1.07813700  |
| B | 3.45040100  | -1.70231000 | 0.17148000  |
| B | -1.12598600 | -1.22357500 | -1.82876300 |
| B | 0.58171100  | 0.86842700  | 0.43561700  |
| B | 1.06232900  | 3.25358600  | -0.06780600 |
| B | -1.53370500 | -0.83864700 | 1.97979100  |
| O | 4.49838600  | -2.27979300 | 0.02287700  |
| O | 0.93500600  | -1.47996500 | 1.01311400  |
| O | -2.56425600 | -0.94057700 | 2.61767900  |
| O | 1.86826900  | 0.44754700  | 0.06684800  |
| O | 1.65402600  | 4.25085000  | -0.43528700 |
| O | -0.89473200 | -2.01740100 | -2.72361900 |
| O | 0.33990900  | 2.25185100  | 0.36974000  |

|    |             |            |             |
|----|-------------|------------|-------------|
| Pd | -1.47924700 | 0.07511300 | -0.40011400 |
|----|-------------|------------|-------------|

**(2'd)**

|    |             |             |             |
|----|-------------|-------------|-------------|
| B  | 2.32525600  | 0.01383600  | -0.00046200 |
| B  | -0.14759800 | 2.08316500  | -0.00027400 |
| B  | 1.42093900  | -1.65295600 | -0.00009600 |
| B  | -0.32001300 | -2.00565400 | -0.00036200 |
| B  | -1.81744800 | -0.80180500 | -0.00034100 |
| B  | -3.79151100 | 0.72558700  | 0.00024400  |
| B  | 3.53297000  | 1.19266100  | 0.00009200  |
| O  | -0.31753100 | 3.28974600  | -0.00081000 |
| O  | 2.74821700  | -1.34250700 | 0.00070400  |
| O  | 4.37907300  | 2.05535000  | 0.00042500  |
| O  | 0.76275800  | -2.87791300 | 0.00028600  |
| O  | -4.51777900 | 1.69913800  | 0.00081300  |
| O  | -3.15174200 | -0.41848600 | -0.00026200 |
| O  | -1.66518600 | -2.21296900 | -0.00043000 |
| Pd | 0.17575100  | 0.01493400  | 0.00000400  |

**(3'a)**

|    |             |             |             |
|----|-------------|-------------|-------------|
| B  | -2.43320600 | -1.17914400 | -0.13439100 |
| B  | -0.33413100 | -0.00006700 | 0.01140300  |
| B  | -3.29457100 | -2.63785000 | -0.19981600 |
| B  | 1.12225700  | 0.00028900  | 2.09830700  |
| B  | -2.43312200 | 1.17914900  | -0.13472800 |
| B  | -3.29449000 | 2.63784500  | -0.20030200 |
| B  | 2.03663400  | -0.00030400 | -1.93692500 |
| O  | -3.92357000 | -3.66351100 | -0.25064100 |
| O  | -1.09050000 | -1.18760400 | -0.04933800 |
| O  | 2.27940200  | -0.00048600 | -3.13128900 |
| O  | -3.14709600 | 0.00000600  | -0.17590500 |
| O  | -3.92349800 | 3.66349600  | -0.25121500 |
| O  | 0.85015200  | 0.00043800  | 3.28679400  |
| O  | -1.09042700 | 1.18754700  | -0.04982600 |
| Pt | 1.58355700  | 0.00001700  | 0.09555900  |

**(3'b)**

|   |             |             |             |
|---|-------------|-------------|-------------|
| B | -2.00778900 | -1.31394600 | 0.31537300  |
| B | 0.14809400  | -1.26592300 | -0.65405200 |
| B | -3.30234100 | -2.18047100 | 0.98373100  |
| B | 2.66135300  | 0.32550000  | 1.37561300  |
| B | -0.96111600 | 0.77428200  | -0.19213700 |
| B | -2.46790100 | 2.69975000  | -0.64300000 |
| B | 1.10716300  | -1.83333200 | -1.91531800 |

|    |             |             |             |
|----|-------------|-------------|-------------|
| O  | -4.22087300 | -2.80241000 | 1.45434400  |
| O  | -0.94289600 | -1.99784000 | -0.18111600 |
| O  | 1.80611800  | -2.17259100 | -2.84276500 |
| O  | -2.07667500 | 0.04184200  | 0.24360500  |
| O  | -3.48884700 | 3.35686500  | -0.72249100 |
| O  | 3.57889700  | 0.32657200  | 2.17477300  |
| O  | -1.31731600 | 2.07390900  | -0.60336400 |
| Pt | 0.99237700  | 0.29948600  | 0.09570600  |

**(3'c)**

|    |             |             |             |
|----|-------------|-------------|-------------|
| B  | 3.02866500  | 1.82672600  | 0.27420400  |
| B  | -0.40941100 | 0.77679300  | 0.90267700  |
| B  | -0.06082300 | -2.15658700 | -0.00630800 |
| B  | -2.64047400 | 0.62319200  | 0.01840300  |
| B  | 1.47437600  | 1.19515200  | 0.46536000  |
| B  | -1.57303400 | -1.09235900 | 1.11237600  |
| B  | -4.00801600 | 1.30855000  | -0.71785300 |
| O  | -2.72610800 | -0.68291600 | 0.46469800  |
| O  | -1.07841400 | -2.38240100 | 0.83067500  |
| O  | 4.15249000  | 2.20645400  | 0.02479800  |
| O  | 0.56509300  | 1.70859600  | 1.34459700  |
| O  | -1.51347600 | 1.33812700  | 0.13755600  |
| O  | -4.98718400 | 1.79653700  | -1.22712000 |
| O  | -0.86987400 | -0.20468900 | 1.85764900  |
| Pt | 0.93081300  | -0.54673100 | -0.48342500 |

**(3'd)**

|    |             |             |             |
|----|-------------|-------------|-------------|
| B  | -2.28550000 | -0.03975200 | 0.00021800  |
| B  | 0.19573600  | -2.06681000 | 0.00012100  |
| B  | -1.38946700 | 1.66598200  | 0.00040800  |
| B  | 0.34469500  | 2.02262400  | -0.00002900 |
| B  | 1.84613300  | 0.79209500  | -0.00047800 |
| B  | 3.83634100  | -0.72117500 | 0.00006400  |
| B  | -3.50730900 | -1.20712000 | -0.00017200 |
| O  | 0.38055600  | -3.27117400 | 0.00024900  |
| O  | -2.70917100 | 1.32199300  | 0.00053300  |
| O  | -4.36159900 | -2.06175700 | -0.00052800 |
| O  | -0.73869500 | 2.89592700  | 0.00051000  |
| O  | 4.57027100  | -1.68918600 | 0.00069500  |
| O  | 3.18237700  | 0.41386500  | -0.00072200 |
| O  | 1.69361000  | 2.20729700  | -0.00048800 |
| Pt | -0.14541000 | -0.00980700 | -0.00003400 |

**(1a)**

|    |             |             |             |
|----|-------------|-------------|-------------|
| B  | -1.31706200 | -1.01719000 | 0.00515400  |
| B  | 3.26025600  | -0.09416900 | -0.00080200 |
| B  | 1.35114200  | 1.02646000  | 0.00529800  |
| B  | -0.77817500 | 1.55323900  | 0.00490600  |
| B  | 4.92123000  | -0.31892600 | -0.00377400 |
| B  | 1.09355200  | -0.65153200 | 0.00163200  |
| B  | -3.34555600 | -1.23993100 | 0.00019200  |
| O  | -2.29713100 | -2.03851800 | 0.01142800  |
| O  | 0.40115500  | 2.06869300  | 0.00912500  |
| O  | -0.04115200 | -1.41353700 | 0.00106000  |
| O  | -4.09414600 | -0.25358800 | -0.01050100 |
| O  | 2.68708200  | 1.19453300  | 0.00189200  |
| O  | 2.36013700  | -1.15837600 | -0.00222300 |
| O  | 6.10757800  | -0.47945800 | -0.00589700 |
| Ni | -2.38982600 | 0.72686600  | -0.00364700 |

**(1b)**

|    |             |             |             |
|----|-------------|-------------|-------------|
| B  | 2.32868600  | -1.35004600 | -0.00035000 |
| B  | 2.84628400  | 0.29780600  | 0.00019900  |
| B  | -0.17434200 | 0.23985800  | -0.00001600 |
| B  | -0.73143300 | 1.92070100  | -0.00025400 |
| B  | 0.05831000  | -1.51528700 | -0.00008400 |
| B  | -2.21570200 | -1.66392200 | 0.00037600  |
| B  | 1.05370400  | 1.63328400  | 0.00031400  |
| O  | 1.23133600  | -2.16589700 | -0.00043700 |
| O  | 2.78653200  | -0.58675700 | -1.07584000 |
| O  | 2.78704700  | -0.58756900 | 1.07553100  |
| O  | 2.38928400  | 1.59394300  | 0.00062500  |
| O  | 0.27443600  | 2.79332200  | 0.00010000  |
| O  | -1.09574400 | -2.32673400 | 0.00017900  |
| O  | -3.18284800 | -0.89089400 | 0.00060200  |
| Ni | -2.04813800 | 0.69831200  | -0.00025000 |

**(1c)**

|   |             |             |             |
|---|-------------|-------------|-------------|
| B | -0.46322800 | 1.97596900  | -0.04516500 |
| B | -0.40842800 | -2.02260700 | -0.08108900 |
| B | 1.25827500  | -1.83186900 | -0.03438300 |
| B | -1.90220000 | 0.73095100  | -0.05701000 |
| B | 2.28491700  | -0.35258300 | -0.07127300 |
| B | 1.18665900  | 1.54130800  | -0.04628400 |
| B | -1.85532300 | -1.13311100 | -0.07947800 |
| O | 1.57628900  | -0.92360800 | 1.03690200  |
| O | -1.82589200 | 2.09000000  | -0.14611000 |

|    |             |             |             |
|----|-------------|-------------|-------------|
| O  | -1.65475800 | -2.46642100 | -0.37051200 |
| O  | 0.62244400  | 2.76120800  | -0.30600600 |
| O  | -2.87058000 | -0.22430000 | -0.20209000 |
| O  | 2.22979500  | -1.42852900 | -0.94936600 |
| O  | 2.41212600  | 0.99738600  | -0.24469900 |
| Ni | -0.15781300 | -0.03522000 | 0.41173100  |

**(1d)**

|    |             |             |             |
|----|-------------|-------------|-------------|
| B  | 1.11116300  | -1.86178000 | -0.00405700 |
| B  | 1.31133000  | 1.62189300  | -0.08077000 |
| B  | -1.69274500 | 1.52666000  | -0.08000700 |
| B  | -0.23956300 | 2.21518900  | -0.10292900 |
| B  | -1.08715200 | -1.56523700 | -0.08591800 |
| B  | -2.19486900 | -0.23940200 | -0.10635400 |
| B  | 2.19613400  | -0.41683700 | 0.02290400  |
| O  | -0.08307000 | -2.47035300 | -0.25332300 |
| O  | 2.24617600  | -1.57162300 | -0.74892900 |
| O  | 1.25262100  | -0.85735600 | 1.00784500  |
| O  | 2.45854600  | 0.89933600  | -0.20375200 |
| O  | 0.90047200  | 2.85709700  | -0.51447300 |
| O  | -2.90819700 | 0.94406400  | -0.19254300 |
| O  | -2.41437000 | -1.55080600 | -0.42728900 |
| Ni | -0.30853300 | 0.27123900  | 0.45876300  |

**(2a)**

|    |             |             |             |
|----|-------------|-------------|-------------|
| B  | -1.14334800 | 1.26861100  | 0.22205000  |
| B  | 3.22426200  | 0.14667500  | -0.09792600 |
| B  | 1.46803600  | -1.23315600 | 0.56986400  |
| B  | -0.66657900 | -1.57417500 | -0.01194100 |
| B  | 4.81633600  | 0.38324700  | -0.56719500 |
| B  | 1.18127400  | 0.96042800  | 0.73347900  |
| B  | -2.70355400 | 1.77847300  | -0.06128200 |
| O  | 0.04847600  | 1.73478200  | 0.51059100  |
| O  | 0.47749900  | -2.14827000 | 0.13759000  |
| O  | 0.96864400  | -0.23722400 | 1.37211800  |
| O  | -3.78199000 | 1.30592200  | -0.37646700 |
| O  | 2.68447200  | -1.13196100 | 0.00499800  |
| O  | 2.37625000  | 1.21425000  | 0.15039800  |
| O  | 5.95285200  | 0.55411700  | -0.90137800 |
| Pd | -2.18895100 | -0.41268400 | -0.24169700 |

**(2b)**

|   |             |            |            |
|---|-------------|------------|------------|
| B | 0.69630700  | 1.52469800 | 0.00013300 |
| B | -1.42493100 | 0.87676200 | 0.00031600 |

|    |             |             |             |
|----|-------------|-------------|-------------|
| B  | 2.61311600  | 1.25002000  | -0.00025400 |
| B  | -5.59201700 | -0.26785900 | -0.00010600 |
| B  | -3.14900100 | -0.50321700 | -0.00057800 |
| B  | -0.96325300 | -0.74885900 | 0.00044200  |
| B  | 1.20114100  | -0.18882100 | 0.00045400  |
| O  | 1.85654000  | 2.32716200  | -0.00036400 |
| O  | -4.42517000 | -0.91059000 | -0.00133800 |
| O  | 0.35676700  | -1.22886600 | 0.00083800  |
| O  | -0.57023300 | 1.97397700  | 0.00022100  |
| O  | -2.78235100 | 0.85388900  | -0.00038600 |
| O  | -2.11430800 | -1.45726100 | -0.00008200 |
| O  | -6.66513000 | 0.27737500  | 0.00104900  |
| Pd | 3.21400600  | -0.53041600 | -0.00003300 |

**(2c)**

|    |             |             |             |
|----|-------------|-------------|-------------|
| B  | 1.25209300  | 1.18912400  | -0.00001600 |
| B  | -1.06271700 | 0.48878400  | 0.00002400  |
| B  | 2.73145300  | 1.95521600  | -0.00016200 |
| B  | -5.40075300 | 0.50332000  | 0.00000800  |
| B  | -3.11091900 | -0.38146800 | -0.00009800 |
| B  | -1.06436700 | -1.21451600 | -0.00006200 |
| B  | 1.15038600  | -1.53401200 | 0.00003800  |
| O  | 3.91693300  | 1.66920100  | -0.00014000 |
| O  | -4.44500000 | -0.42756500 | -0.00018000 |
| O  | 0.01072400  | -2.12798600 | -0.00001200 |
| O  | -0.03881100 | 1.42391300  | 0.00011700  |
| O  | -2.37630800 | 0.81514900  | -0.00007400 |
| O  | -2.36128500 | -1.57029300 | -0.00002200 |
| O  | -6.28308900 | 1.32081500  | 0.00018500  |
| Pd | 2.61171300  | -0.30126300 | 0.00005100  |

**(2d)**

|   |             |             |             |
|---|-------------|-------------|-------------|
| B | 0.97408500  | 1.14662200  | 0.00027200  |
| B | -1.43497400 | 0.68765000  | -0.00025900 |
| B | 3.06548800  | 1.54501600  | 0.00052900  |
| B | -5.26224400 | 0.32262900  | -0.00066900 |
| B | -3.59968600 | 0.11114900  | -0.00021900 |
| B | -1.68127000 | -0.99710400 | 0.00057200  |
| B | 0.43935800  | -1.52286700 | 0.00046400  |
| O | 3.93705200  | 0.67702200  | -0.00013000 |
| O | -2.70729600 | 1.18091700  | -0.00048900 |
| O | -0.73622500 | -2.04560700 | 0.00095600  |
| O | 1.91048500  | 2.19091300  | 0.00127600  |
| O | -0.31863100 | 1.47531700  | -0.00039500 |



|    |             |             |             |
|----|-------------|-------------|-------------|
| O  | -3.01603100 | -1.17205500 | 0.00052400  |
| O  | -6.44975800 | 0.47355300  | 0.00001900  |
| Pd | 2.09868400  | -0.62404200 | -0.00038100 |

**(3a)**

|    |             |             |             |
|----|-------------|-------------|-------------|
| B  | -5.18362300 | 0.25461100  | -0.53561800 |
| B  | 2.62000100  | 1.51289500  | -0.19424800 |
| B  | -1.52768700 | 0.99205500  | 0.64219900  |
| B  | -3.57792200 | 0.08059200  | -0.08309200 |
| B  | 0.80479600  | 1.43614300  | 0.16707300  |
| B  | -1.78766800 | -1.22646600 | 0.63441400  |
| B  | 0.34129700  | -1.62350700 | 0.08815000  |
| O  | 1.82566300  | 2.48750500  | 0.06948700  |
| O  | -0.44938200 | 1.80566600  | 0.38274300  |
| O  | -1.27019300 | -0.16959700 | 1.33594600  |
| O  | -3.01663700 | -1.18243600 | 0.09234900  |
| O  | -2.74979200 | 1.17416800  | 0.07872300  |
| O  | -0.80412100 | -2.18125400 | 0.27215200  |
| O  | -6.32969800 | 0.37873900  | -0.85849400 |
| Pt | 1.84496500  | -0.32864000 | -0.18689300 |

**(3b)**

|    |             |             |             |
|----|-------------|-------------|-------------|
| B  | -5.21552100 | 0.31477300  | -0.57108600 |
| B  | 2.27863900  | 1.91928100  | -0.03598300 |
| B  | -1.59684900 | 1.02073200  | 0.71733700  |
| B  | -3.61778800 | 0.13085900  | -0.09668400 |
| B  | 0.71787400  | 1.39103000  | 0.24151100  |
| B  | -1.82677400 | -1.19341800 | 0.59388100  |
| B  | 0.31512500  | -1.49903900 | 0.05661100  |
| O  | 3.33990500  | 1.38063400  | -0.32924100 |
| O  | -0.49437100 | 1.83529300  | 0.49775800  |
| O  | -1.34620800 | -0.16524100 | 1.36631600  |
| O  | -3.04593300 | -1.13200400 | 0.02921700  |
| O  | -2.80148300 | 1.22603300  | 0.13311200  |
| O  | -0.81851400 | -2.10305200 | 0.19441000  |
| O  | -6.35644100 | 0.44752900  | -0.90798400 |
| Pt | 1.75526700  | -0.28634200 | -0.15893100 |

**(3c)**

|   |             |             |             |
|---|-------------|-------------|-------------|
| B | 5.81639700  | 0.38012500  | 0.00101000  |
| B | -2.63498700 | 1.75558900  | 0.00005000  |
| B | 3.51003500  | -0.45631200 | -0.00045100 |
| B | 1.44925500  | -1.24794100 | -0.00112800 |
| B | -0.81646400 | 1.32817600  | -0.00124100 |

|    |             |             |             |
|----|-------------|-------------|-------------|
| B  | 1.47366900  | 0.45786400  | -0.00103100 |
| B  | -0.77898100 | -1.57893100 | -0.00022100 |
| O  | -1.62018100 | 2.54930800  | -0.00160200 |
| O  | 2.80188600  | 0.74936500  | -0.00061600 |
| O  | 0.36771300  | -2.15401200 | -0.00159100 |
| O  | 2.73792300  | -1.63097600 | -0.00078400 |
| O  | 4.84478100  | -0.53306300 | -0.00006800 |
| O  | 0.50321300  | 1.43085300  | -0.00116100 |
| O  | 6.71600000  | 1.17915500  | 0.00205400  |
| Pt | -2.19109400 | -0.20407500 | 0.00058000  |

**(3d)**

|    |             |             |             |
|----|-------------|-------------|-------------|
| B  | -5.95808600 | -0.86155200 | -0.00037100 |
| B  | 2.23449700  | 1.27608000  | -0.00031800 |
| B  | -3.81757800 | 0.33461900  | 0.00023000  |
| B  | -1.90044700 | 1.42121500  | 0.00037000  |
| B  | 0.52589400  | -0.03514200 | 0.00021200  |
| B  | -1.69408100 | -0.25630500 | 0.00084300  |
| B  | 0.29473300  | 1.72988600  | -0.00010900 |
| O  | 1.55990300  | 2.39210400  | -0.00024200 |
| O  | -2.94550000 | -0.77426900 | 0.00056900  |
| O  | -0.88305100 | 2.37266900  | -0.00016400 |
| O  | -3.24316100 | 1.61298000  | 0.00019400  |
| O  | -5.15101400 | 0.19762300  | -0.00013000 |
| O  | -0.46960100 | -0.93573800 | 0.00055700  |
| O  | -6.71478100 | -1.79803200 | -0.00068500 |
| Pt | 2.49170500  | -0.54593200 | -0.00006500 |
